# Supplementary material
Source: PubMed Central journal article supplement (PMC8297567)

**Supplemental Material for Review AND Online Publication**

Supplemental Figure 1. Changes in Perceived Stress (PSS) Among Black and White Caregivers and Noncaregiving Controls.

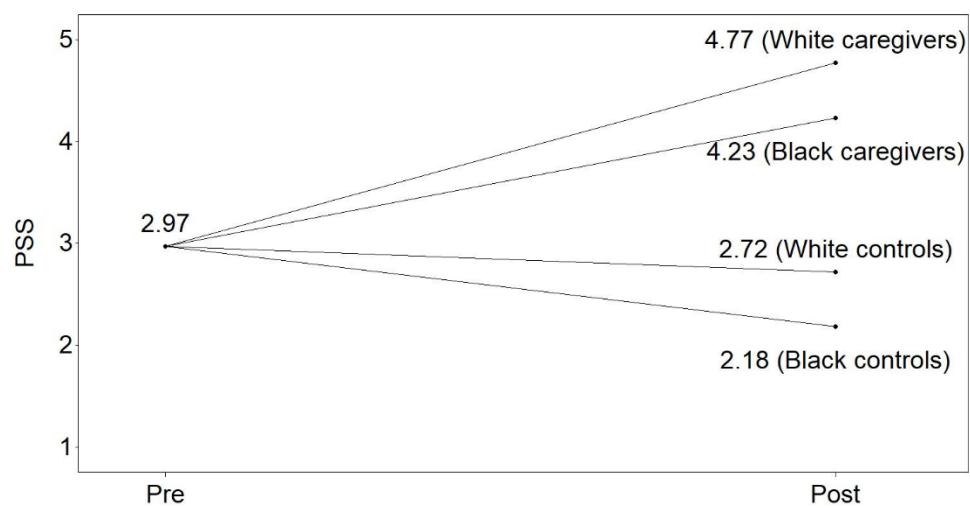

Supplemental Figure 2. Changes in Depressive Symptoms (CES-D) among Older and Younger Caregivers and Noncaregiving Controls (yo=Years Old)

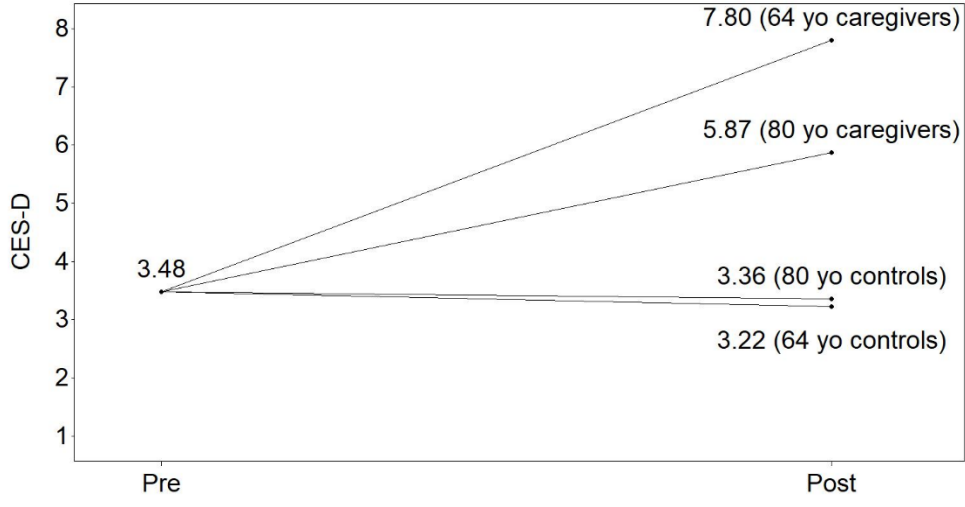

Supplemental Figure 3. Changes in Physical Health Quality of Life (PCS) among Older and Younger Caregivers and Noncaregiving Controls (yo=Years Old)

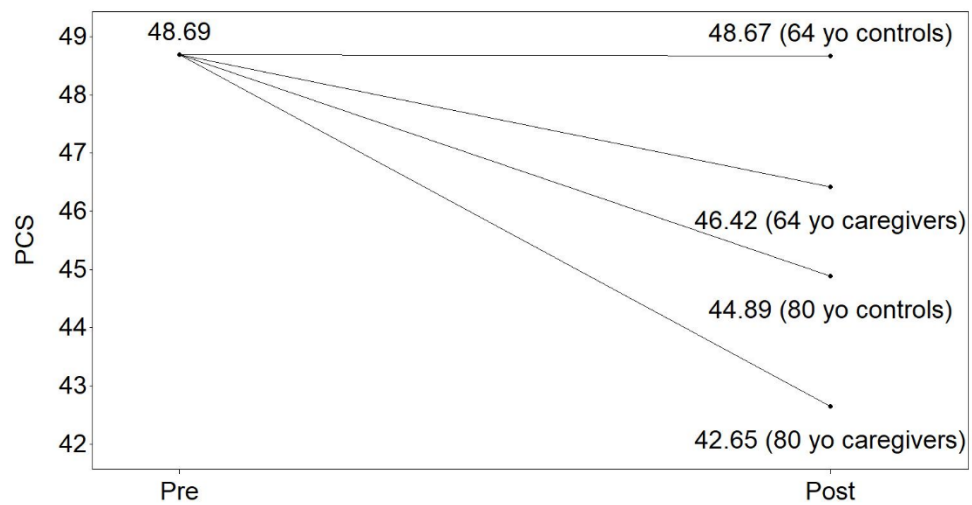

Supplement: NIHMS1721401-supplement-supinfo.pdf [file NIHMS1721401-supplement-supinfo.pdf]
